# Supplementary material
Source: PubMed Central journal article supplement (PMC3395588)

**A**

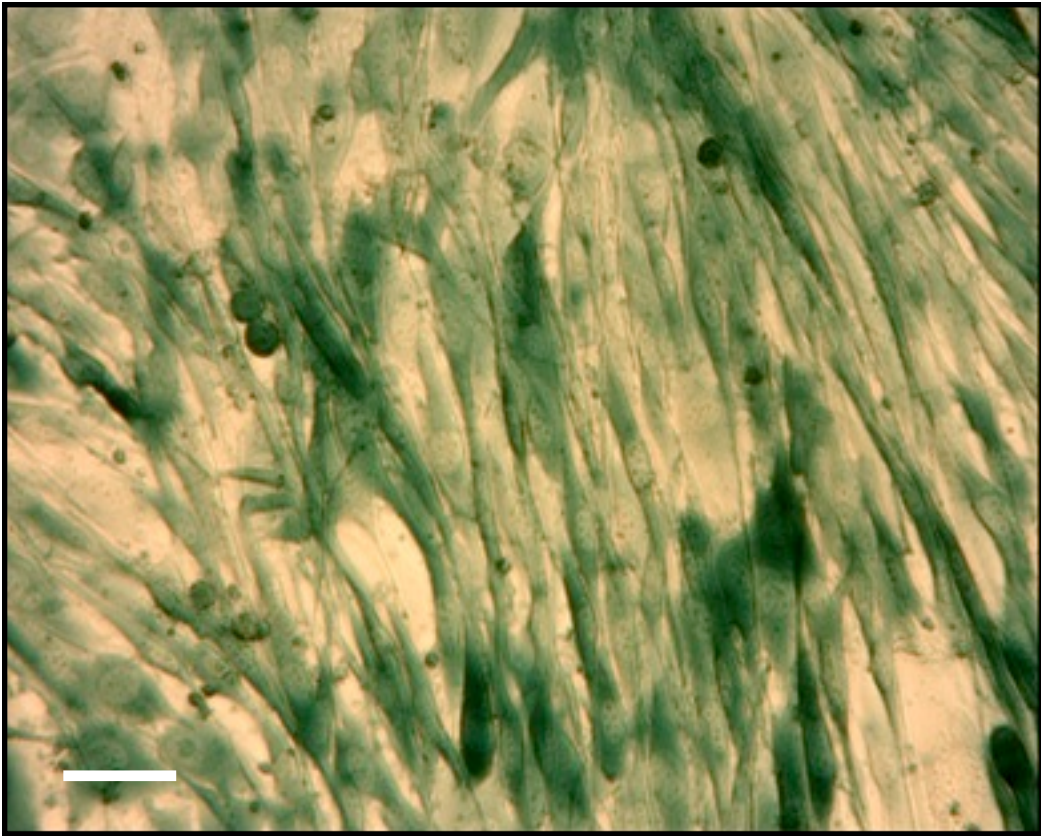

**B**

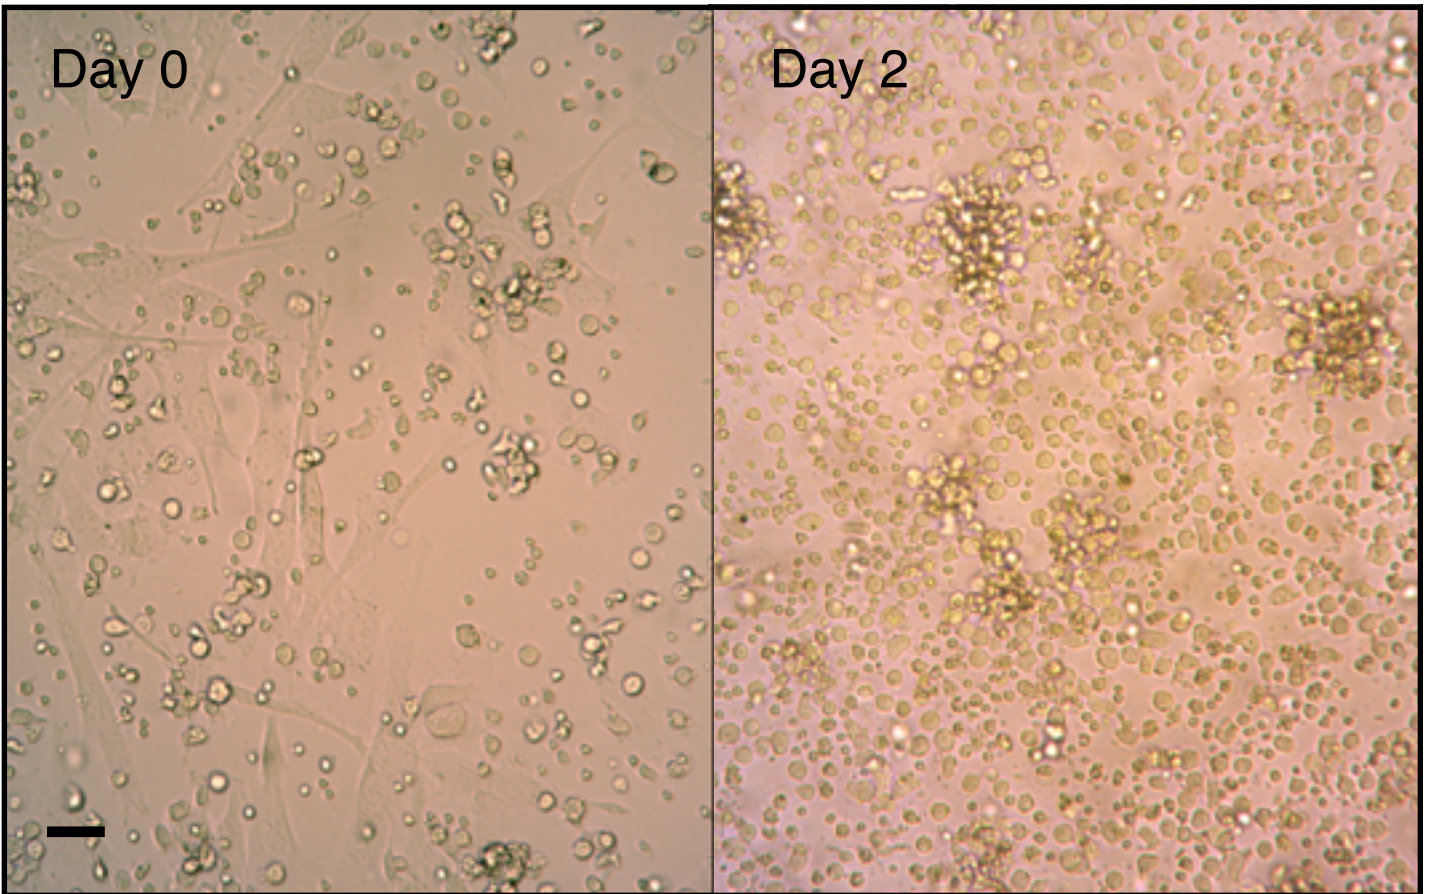

**Supplementary Fig. 1**

Supplement: NIHMS386508-supplement-01.pdf [file NIHMS386508-supplement-01.pdf]
